# Supplementary material for: Comparison of mental health outcomes in seropositive and seronegative adolescents during the COVID19 pandemic
Source: PubMed Central journal article supplement (PMC8831534; doi:10.1038/s41598-022-06166-y), 2022-02-10
Supplement: 41598_2022_6166_MOESM1_ESM.pdf [file 41598_2022_6166_MOESM1_ESM.pdf]

**Comparison of mental health outcomes in seropositive and seronegative adolescents during the COVID19 pandemic**

Judith Blankenburg<sup>1</sup>, MD, Magdalena K. Wekenborg<sup>2</sup>, PhD, Jörg Reichert<sup>1</sup>, PhD, Carolin Kirsten<sup>1</sup>, Elisabeth Kahre<sup>1</sup>, MD, Luise Haag<sup>1</sup>, MD, Leonie Schumm<sup>1</sup>, MD, Paula Czyborra<sup>1</sup>, MD, Reinhard Berner<sup>1</sup>, MD, Jakob P. Armann<sup>1,\*</sup>, MD

*Supplementals - Figure 1* Prevalence of neurocognitive, pain and mood symptoms in LIAISON<sup>®</sup>-negative and positive study participants (Fisher's exact test: n = 1553, \* p < .05)

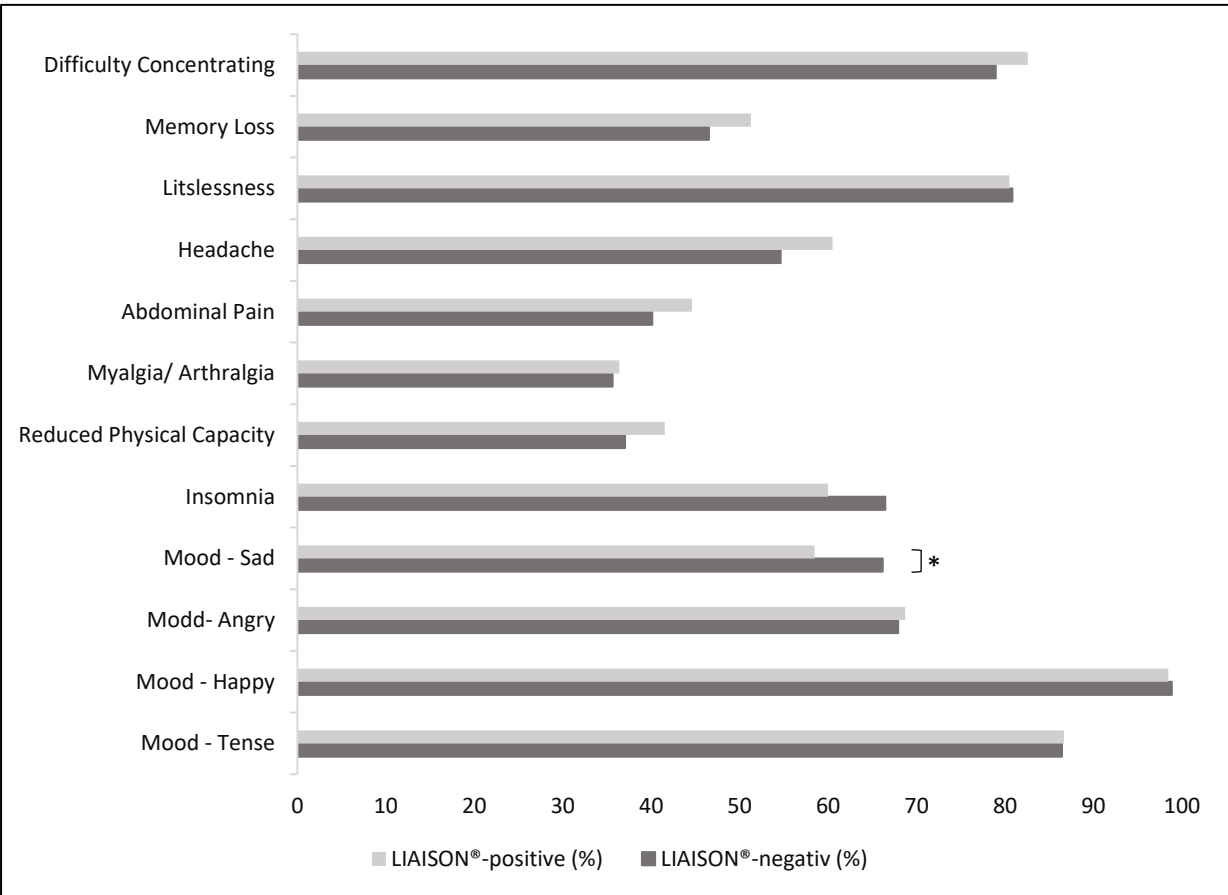

*Supplementals - Table 1* Demographic data and serostatus of the participating students at study visit in March/ April 2021; IQR – Interquartile range (n = 1553)

|                                     | <b>Seronegative Students</b> | <b>Seropositive Students</b> |
|-------------------------------------|------------------------------|------------------------------|
| <b>Median Age, (IQR), (range)</b>   | 15, (14-16), (10 - 38)       | 15, (14-17), (10 - 35)       |
| <b>Female n (%)</b>                 | 762 (56)                     | 104 (55)                     |
| <b>Median Household size, (IQR)</b> | 4, (3-5)                     | 4, (4-5)                     |
